# Supplementary material
Source: publisher site journal article supplement (https://www.dovepress.com/article/580421)
Supplement: Supplementary file 1 [file 580421_Supplementary_Material_Corrected_1.pdf]

**Table S1. Critical concentrations (CCs) for phenotypic drug susceptibility testing (DST) of 16 anti-tuberculosis drugs**

| Drug Name                   | Abbreviation | Critical Concentration (CC, mg/L) |
|-----------------------------|--------------|-----------------------------------|
| Isoniazid                   | INH          | 0.2                               |
| Rifampicin                  | RFP          | 1                                 |
| Ethambutol                  | EMB          | 5                                 |
| Streptomycin                | Sm           | 1                                 |
| Rifapentine                 | Rft          | 0.5                               |
| Rifabutin                   | Rfb          | 0.5                               |
| Levofloxacin                | Lfx          | 1                                 |
| Moxifloxacin                | Mfx          | 0.5                               |
| Kanamycin                   | Km           | 2.5                               |
| Amikacin                    | AMK          | 1                                 |
| Capreomycin                 | Cm           | 2.5                               |
| Prothionamide               | Pto          | 2.5                               |
| Para-aminosalicylic acid    | PAS          | 2                                 |
| Clofazimine                 | Cfz          | 1                                 |
| Clarithromycin              | Clr          | 8                                 |
| Isoniazid-p-aminosalicylate | Pa           | See footnote                      |

CCs were based on WHO recommendations for the broth microdilution method. Isolates with MIC > CC were classified as resistant; MIC ≤ CC as susceptible. For isoniazid-p-aminosalicylate (Pa), no international breakpoint exists; susceptibility was determined per manufacturer's criteria. All assays included *Mtb* H37Rv (ATCC 27294) as quality control, with results consistently within acceptable limits.

**Table S2. Definitions of Drug Resistance Types in Tuberculosis**

| Drug Resistance Type | Definition                                                                                                                                                               |
|----------------------|--------------------------------------------------------------------------------------------------------------------------------------------------------------------------|
| INH-Mono             | A form of tuberculosis (TB) in which the <i>Mycobacterium tuberculosis</i> strain is resistant to isoniazid (INH) but susceptible to all other first-line anti-TB drugs. |
| Poly-DR              | TB that is resistant to more than one anti-TB drug but not to both isoniazid (INH) and rifampicin (RIF), the two core first-line drugs.                                  |
| MDR/RR-TB            | TB that is resistant to at least isoniazid (INH) and rifampicin (RIF), regardless of resistance to other drugs.                                                          |
| Pre-XDR-TB           | A type of MDR-TB that is also resistant to any one of the fluoroquinolones (FQs) or a second-line injectable drug, but does not meet the criteria for XDR-TB.            |

Classification of *Mtb* isolates at T1 and T2 according to the 2021 WHO definitions: isoniazid-mono-resistant (INH-Mono), poly-drug resistant (Poly-DR), multidrug-resistant or rifampicin-resistant tuberculosis (MDR/RR-TB), and pre-extensively drug-resistant tuberculosis (Pre-XDR-TB).
